# Supplementary material for: Highly defective CeO2 as a promoter for efficient and stable water oxidation
Source: Royal Society of Chemistry journal article supplement (doi:10.1039/c4ta05770h), 2014-11-11
Supplement: c4ta05770h1.pdf [file c4ta05770h1.pdf]

### Supporting Information

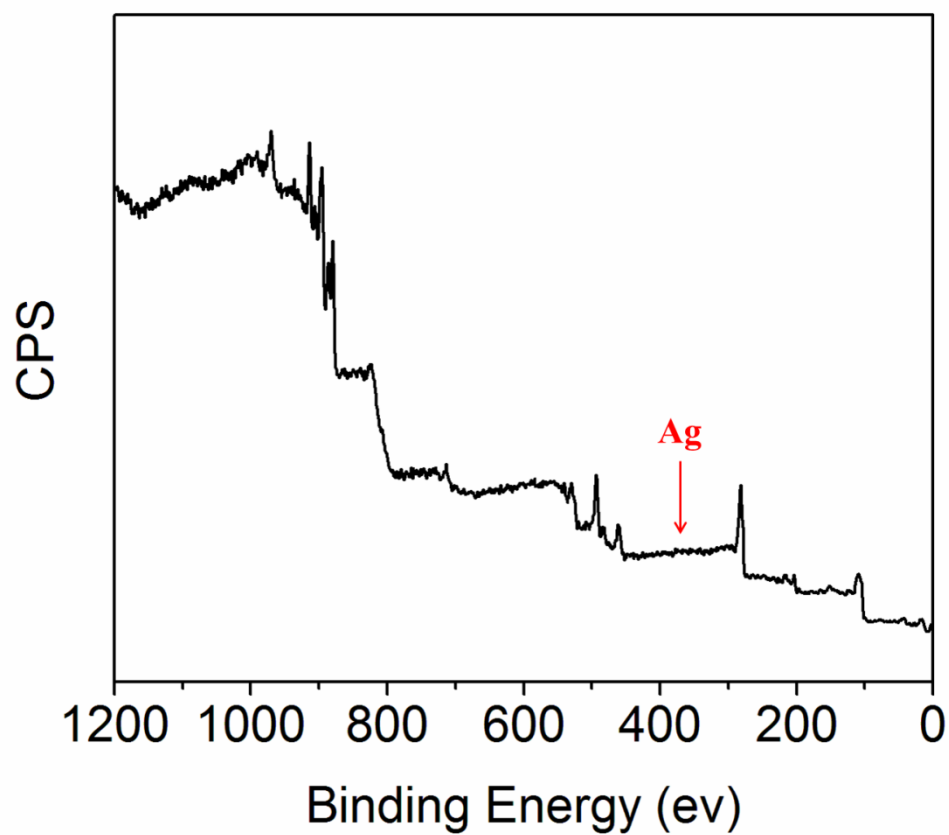

**Figure S1.** XPS survey scan of the defective RuO<sub>2</sub> supported CeO<sub>2</sub> catalyst. The XPS signals of Ag 3d should appear at a binding energy of around 370 eV, and there is no peak in the survey scan thus confirms the absence of Ag in the catalyst.

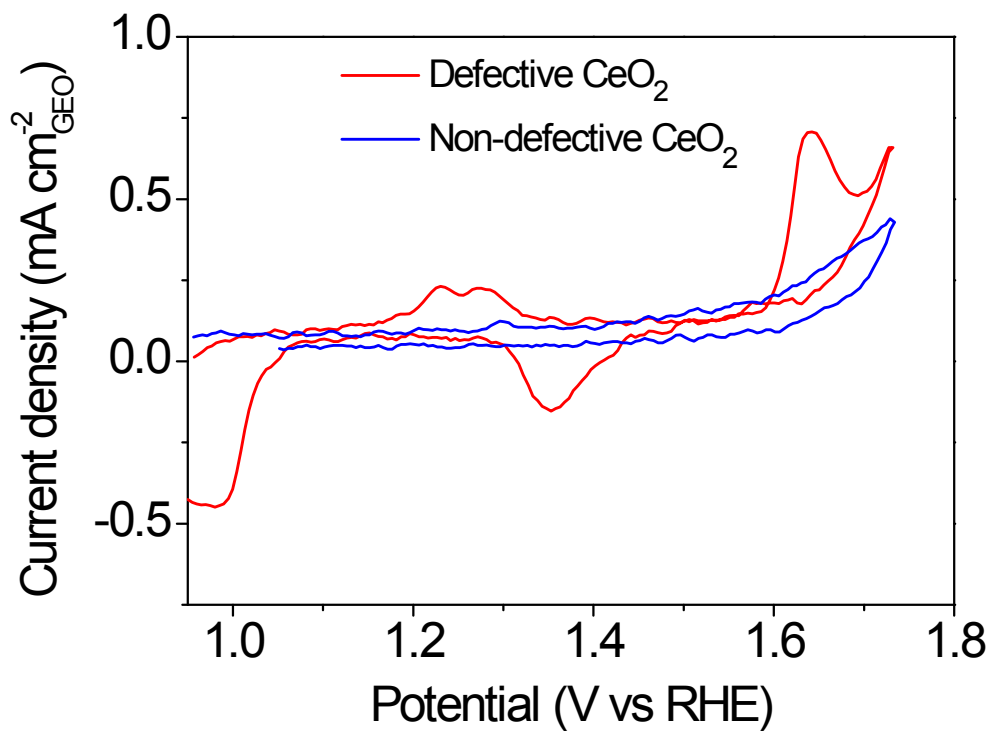

**Figure S2.** Cyclic voltammograms (CV) measurement results of the defective and non-defective CeO<sub>2</sub>. The OER activity is very low for both CeO<sub>2</sub> oxides.

**Table S1 Structural parameters of RuO<sub>2</sub>-CeO<sub>2</sub> composite obtained from Rietveld refinement**

**Phase 1: CeO<sub>2</sub>**

Spacegroup: Fm-3m

Lattice parameters

a=b=c=5.4159975 Å

| h | k | l | d <sub>space</sub> | 2θ       | Intensity |
|---|---|---|--------------------|----------|-----------|
| 1 | 1 | 1 | 3.12693            | 28.52248 | 1.16      |
| 0 | 0 | 2 | 2.70800            | 33.05229 | 0.492     |
| 0 | 2 | 2 | 1.91484            | 47.44122 | 2.68      |
| 3 | 1 | 1 | 1.63298            | 56.29093 | 3.41      |
| 2 | 2 | 2 | 1.56346            | 59.03466 | 0.722     |
| 0 | 0 | 4 | 1.35400            | 69.34791 | 1.24      |
| 3 | 3 | 1 | 1.24252            | 76.62506 | 2.89      |
| 0 | 4 | 2 | 1.21105            | 78.99669 | 1.94      |
| 4 | 2 | 2 | 1.10554            | 88.33596 | 3.44      |

**Phase 2: RuO<sub>2</sub>**

Spacegroup: P<sub>4</sub><sub>2</sub>/mnm

Lattice parameters

a=b=4.5117244 Å

c=3.1030311 Å

| h | k | l | d <sub>space</sub> | 2θ       | Intensity |
|---|---|---|--------------------|----------|-----------|
| 1 | 1 | 0 | 3.19027            | 27.94453 | 0.886     |
| 0 | 1 | 1 | 2.55670            | 35.06966 | 1.9       |
| 0 | 2 | 0 | 2.25586            | 39.93231 | 0.589     |
| 1 | 1 | 1 | 2.22438            | 40.52214 | 0.259     |
| 2 | 1 | 0 | 2.01770            | 44.88666 | 0.0674    |
| 2 | 1 | 1 | 1.69155            | 54.17882 | 5.42      |
| 2 | 2 | 0 | 1.59514            | 57.75054 | 1.49      |
| 0 | 0 | 2 | 1.55152            | 59.53492 | 1.02      |
| 3 | 1 | 0 | 1.42673            | 65.35415 | 1.39      |
| 2 | 2 | 1 | 1.41867            | 65.77255 | 0.408     |
| 1 | 1 | 2 | 1.39526            | 67.01968 | 2.36      |
| 0 | 3 | 1 | 1.35334            | 69.38659 | 1.41      |
| 3 | 1 | 1 | 1.29628            | 72.91671 | 0.252     |
| 0 | 2 | 2 | 1.27835            | 74.10850 | 1.35      |
| 3 | 2 | 0 | 1.25133            | 75.98885 | 0.278     |
| 2 | 1 | 2 | 1.22993            | 77.55412 | 0.364     |

|   |   |   |         |          |       |
|---|---|---|---------|----------|-------|
| 3 | 2 | 1 | 1.16052 | 83.17345 | 3.05  |
| 0 | 4 | 0 | 1.12793 | 86.14606 | 0.863 |
| 2 | 2 | 2 | 1.11219 | 87.67201 | 2.02  |
| 4 | 1 | 0 | 1.09425 | 89.48926 | 0.192 |
